# Supplementary material for: Gene invasion in distant eukaryotic lineages: discovery of mutually exclusive genetic elements reveals marine biodiversity
Source: PubMed Central journal article supplement — ISME J. 2013 May 2;7(9):1764–74. doi: 10.1038/ismej.2013.70 (PMC3749507; doi:10.1038/ismej.2013.70), 2013-05-02
Supplement: ismej201370x2.pdf [file ismej201370x2.pdf]

**Table S1.** Primers designed in this study and PCR conditions. 25 ul PCR reactions included 12.5 ul HotStar Taq polymerase (Qiagen), 7.5 pmol each primer, 1 ul template DNA and H<sub>2</sub>O. Cycling conditions were 95 °C (15 min), followed by 30 cycles at 94 °C (30 s), 54 or 62°C and 72 °C (2 min), and final extension at 72 °C (10 min). Most cloned libraries were built with 54°C products.

| primer pair     | expected product           | forward primer (5'-3') | reverse primer (5'-3') | Annealing Temp. (°C) |               |
|-----------------|----------------------------|------------------------|------------------------|----------------------|---------------|
|                 |                            |                        |                        | tested               | yielding band |
| PRP8f - PRP8r   | no<br>insert/intron/intein | TCATCTTGTACGACTTTCTCGG | TTAACCGAGCGAACGTCTACG  | 54 and 62            | both          |
| PRP8if2 - PRP8r | 5' half of intein          | CTCGTCCATCTGACTCACGG   | TTAACCGAGCGAACGTCTACG  | 54 and 62            | both          |
| PRP8f - PRP8ir  | 3' half of intein          | TCATCTTGTACGACTTTCTCGG | AAGGAGGTGCGGGATCTTGC   | 54 and 62            | 54            |
