# Supplementary material for: Gene invasion in distant eukaryotic lineages: discovery of mutually exclusive genetic elements reveals marine biodiversity
Source: PubMed Central journal article supplement — ISME J. 2013 May 2;7(9):1764–74. doi: 10.1038/ismej.2013.70 (PMC3749507; doi:10.1038/ismej.2013.70), 2013-05-02
Supplement: ismej201370x3.pdf [file ismej201370x3.pdf]

**Table S2.** Environmental-PCR product identifiers and metadata from corresponding sampling sites. The *Bathycoccus* PRP8 full intein sequence from the targeted metagenome is on contig C1684, Genbank accession number: AFUW01000096.

| Clone identifier  | Genbank identifier | Insertion type | Insert length (nt) | Cruise name | Site                       | Latitude | Longitude | Sampling date | Depth (m) | Temp (°C) | NO <sub>3</sub> +NO <sub>2</sub> (μM) | PO <sub>4</sub> (μM) | Salinity (psu) |
|-------------------|--------------------|----------------|--------------------|-------------|----------------------------|----------|-----------|---------------|-----------|-----------|---------------------------------------|----------------------|----------------|
| <b>TAi1PRP8</b>   | JX625117           | intron         | 135                | SJ0609      | Tropical Atlantic          | 12°22'N  | 27°14'W   | 12-Jul-2006   | 64        | 21.7      | 0.2                                   | 0.00                 | 35.90          |
| <b>TAi2PRP8</b>   | JX625118           | intron         | 135                | SJ0609      | Tropical Atlantic          | 12°22'N  | 27°14'W   | 12-Jul-2006   | 64        | 21.7      | 0.2                                   | 0.00                 | 35.90          |
| <b>TAi3cPRP8*</b> | JX625119           | intron         | 135                | SJ0609      | Tropical Atlantic          | 12°22'N  | 27°14'W   | 12-Jul-2006   | 64        | 21.7      | 0.2                                   | 0.00                 | 35.90          |
| <b>TAi3dPRP8*</b> | JX625119           | intron         | 135                | SJ0609      | Tropical Atlantic          | 12°22'N  | 27°14'W   | 12-Jul-2006   | 64        | 21.7      | 0.2                                   | 0.00                 | 35.90          |
| <b>TAfiPRP8</b>   | JX625120           | intein         | 1686               | SJ0609      | Tropical Atlantic          | 12°22'N  | 27°14'W   | 12-Jul-2006   | 64        | 21.7      | 0.2                                   | 0.00                 | 35.90          |
| <b>CNPi1PRP8</b>  | JX625121           | intron         | 135                | KM0715      | Central N. Pacific (ALOHA) | 22°45'N  | 158°00'W  | 17-Aug-2007   | 150       | 21.7      | 0.38                                  | 0.06                 | 35.13          |
| <b>ENP1PRP8</b>   | JX625122           | no insert      | 0                  | CN207       | Eastern N. Pacific         | 37°7'N   | 123°29'W  | 10-Oct-2007   | 10        | 15.6      | 0.51                                  | 0.61                 | 33.15          |
| <b>NAS1PRP8</b>   | JX625123           | no insert      | 0                  | OC374       | N. Atlantic Slope          | 39°44'N  | 69°39'W   | 5-Mar-2001    | 2         | 11.0      | n.d.                                  | n.d.                 | 34.40          |
| <b>SS1PRP8</b>    | JX625124           | no insert      | 0                  | OC374       | Sargasso Sea (BATS)        | 32°10'N  | 64°30'W   | 13-Mar-2001   | 60        | 20.0      | n.d.                                  | n.d.                 | 36.68          |
| <b>SS2PRP8</b>    | JX625125           | no insert      | 0                  | OC374       | Sargasso Sea (BATS)        | 32°10'N  | 64°30'W   | 13-Mar-2001   | 60        | 20.0      | n.d.                                  | n.d.                 | 36.68          |
| <b>SS3PRP8</b>    | JX625126           | no insert      | 0                  | OC374       | Sargasso Sea (BATS)        | 32°10'N  | 64°30'W   | 13-Mar-2001   | 60        | 20.0      | n.d.                                  | n.d.                 | 36.68          |
| <b>SSfi1PRP8</b>  | JX625127           | intein         | 1665               | OC374       | Sargasso Sea (BATS)        | 32°10'N  | 64°30'W   | 13-Mar-2001   | 60        | 20.0      | n.d.                                  | n.d.                 | 36.68          |
| <b>SSfi2PRP8</b>  | JX625128           | intein         | 1686               | OC374       | Sargasso Sea (BATS)        | 32°10'N  | 64°30'W   | 13-Mar-2001   | 60        | 20.0      | n.d.                                  | n.d.                 | 36.68          |
| <b>SSfi3PRP8</b>  | JX625129           | intein         | 1686               | OC374       | Sargasso Sea (BATS)        | 32°10'N  | 64°30'W   | 13-Mar-2001   | 60        | 20.0      | n.d.                                  | n.d.                 | 36.68          |

Abbreviations: \*Sequences are 100% identical and deposited as a single Genbank entry, the corresponding PCR was run at 62°C annealing temperature; n.d., not determined; Sequence names: TA, tropical Atlantic Ocean (nearest land mass was Cape Verde); CNP, Central North Pacific (Station ALOHA), ENP, Eastern N. Pacific (CalCOFI line 67); NAS, North Atlantic Slope off USA; SS, Sargasso Sea, N. Atlantic Subtropical Gyre (at BATS site); codes in sequence names following site specification: i, intron containing; fi, full intein containing.
