# Supplementary material for: Gene invasion in distant eukaryotic lineages: discovery of mutually exclusive genetic elements reveals marine biodiversity
Source: PubMed Central journal article supplement — ISME J. 2013 May 2;7(9):1764–74. doi: 10.1038/ismej.2013.70 (PMC3749507; doi:10.1038/ismej.2013.70), 2013-05-02
Supplement: ismej201370x4.pdf [file ismej201370x4.pdf]

**Table S3.** PRP8 extein and intein sequences used in this study. SAR indicates the Stramenopiles-Alveolata-Rhizaria hypothetical supergroup.

| <b>Organism</b>                       | <b>Eukaryotic supergroup</b> | <b>Protein identifier</b> | <b>Database source*</b> | <b>Intein presence</b> |
|---------------------------------------|------------------------------|---------------------------|-------------------------|------------------------|
| <i>Wild Bathycoccus</i>               | Plantae                      | AFUW01000096              | GenBank                 | yes                    |
| <i>Bathycoccus</i> strain BBan7       | Plantae                      | F Bathy18g01340           | Bogas                   | no                     |
| <i>Micromonas pusilla</i> CCMP1545    | Plantae                      | XP_003061371              | RefSeq nr               | no                     |
| <i>Micromonas</i> sp. RCC299          | Plantae                      | XP_002509397              | RefSeq nr               | no                     |
| <i>Ostreococcus tauri</i>             | Plantae                      | CAL55631                  | EMBL                    | no                     |
| <i>Ostreococcus lucimarinus</i>       | Plantae                      | XP_001420401              | RefSeq nr               | no                     |
| <i>Ostreococcus</i> sp. RCC809        | Plantae                      | 59290                     | DoE-JGI                 | no                     |
| <i>Coccomyxa subellipsoidea</i>       | Plantae                      | EIE25534                  | RefSeq nr               | no                     |
| <i>Volvox carteri</i>                 | Plantae                      | XP_002956689              | RefSeq nr               | no                     |
| <i>Chlamydomonas reinhardtii</i>      | Plantae                      | XP_001689471              | RefSeq nr               | no                     |
| <i>Chlorella variabilis</i>           | Plantae                      | EFN52246                  | RefSeq nr               | no                     |
| <i>Populus trichocarpa</i>            | Plantae                      | XP_002327417              | RefSeq nr               | no                     |
| <i>Vitis vinifera</i>                 | Plantae                      | CBI36339                  | RefSeq nr               | no                     |
| <i>Arabidopsis thaliana</i>           | Plantae                      | NP_178124                 | RefSeq nr               | no                     |
| <i>Physcomitrella patens</i>          | Plantae                      | XP_001785044              | RefSeq nr               | no                     |
| <i>Phaeodactylum tricornutum</i>      | SAR                          | XP_002179646              | RefSeq nr               | no                     |
| <i>Thalassiosira pseudonana</i>       | SAR                          | XP_002287554              | RefSeq nr               | no                     |
| <i>Phytophthora infestans</i>         | SAR                          | XP_002901763              | RefSeq nr               | no                     |
| <i>Ectocarpus siliculosus</i>         | SAR                          | CBN74629                  | RefSeq nr               | no                     |
| <i>Aureococcus anophagefferens</i>    | SAR                          | EGB05047                  | RefSeq nr               | no                     |
| <i>Tetrahymena thermophila</i>        | SAR                          | XP_001015771              | RefSeq nr               | no                     |
| <i>Paramecium tetraurelia</i>         | SAR                          | XP_001434030              | RefSeq nr               | no                     |
| <i>Perkinsus marinus</i>              | SAR                          | XP_002774058              | RefSeq nr               | no                     |
| <i>Plasmodium knowlesi</i>            | SAR                          | XP_002261014              | RefSeq nr               | no                     |
| <i>Theileria annulata</i>             | SAR                          | XP_954981                 | RefSeq nr               | no                     |
| <i>Toxoplasma gondii</i>              | SAR                          | XP_002368068              | RefSeq nr               | no                     |
| <i>Capsaspora owczarzaki</i>          | Opisthokonta                 | EFW41973                  | Broad OoM               | yes                    |
| <i>Salpingoeca rosetta</i>            | Opisthokonta                 | PTSG_00100                | Broad OoM               | yes                    |
| <i>Monosiga brevicollis</i>           | Opisthokonta                 | XP_001747121              | RefSeq nr               | no                     |
| <i>Mus musculus</i>                   | Opisthokonta                 | NP_619600                 | RefSeq nr               | no                     |
| <i>Daphnia pulex</i>                  | Opisthokonta                 | EFX85628                  | RefSeq nr               | no                     |
| <i>Drosophila melanogaster</i>        | Opisthokonta                 | NP_610735                 | RefSeq nr               | no                     |
| <i>Caenorhabditis elegans</i>         | Opisthokonta                 | NP_498785                 | RefSeq nr               | no                     |
| <i>Nematostella vectensis</i>         | Opisthokonta                 | XP_001633987              | RefSeq nr               | no                     |
| <i>Spizellomyces punctatus</i>        | Opisthokonta                 | SPPG_02894                | Broad OoM               | yes                    |
| <i>Batrachochytrium dendrobatidis</i> | Opisthokonta                 | EGF81600                  | Broad OoM               | yes                    |
| <i>Phycomyces blakesleeanus</i>       | Opisthokonta                 | Phybl1_79621              | Broad OoM               | yes                    |
| <i>Rhizopus oryzae</i>                | Opisthokonta                 | EIE76368                  | RefSeq nr               | no                     |
| <i>Cryptococcus neoformans</i>        | Opisthokonta                 | XP_566595                 | RefSeq nr               | yes                    |
| <i>Cryptococcus gattii</i>            | Opisthokonta                 | XP_003191948              | RefSeq nr               | yes                    |
| <i>Lacaria bicolor</i>                | Opisthokonta                 | XP_001875909              | RefSeq nr               | no                     |
| <i>Ustilago maydis</i>                | Opisthokonta                 | XP_757683                 | RefSeq nr               | no                     |
| <i>Schizosaccharomyces pombe</i>      | Opisthokonta                 | NP_593861                 | RefSeq nr               | no                     |
| <i>Saccharomyces cerevisiae</i>       | Opisthokonta                 | EDV09210                  | RefSeq nr               | no                     |

|                                      |              |              |           |     |
|--------------------------------------|--------------|--------------|-----------|-----|
| <i>Neosartorya fischeri</i>          | Opisthokonta | EAW23970     | RefSeq nr | yes |
| <i>Paracoccidioides brasiliensis</i> | Opisthokonta | XP_002791246 | RefSeq nr | yes |

\*: RefSeq nr: NCBI reference sequence non-redundant database; Broad OoM: Broad Institute Origins of Multicellularity Database.
